# Supplementary material for: Molecular profiling and sex determination of Cannabis sativa germplasm collection: Exploring microsatellite markers and high-resolution melting (HRM) analysis
Source: PeerJ. 2025 Aug 8;13:e19770. doi: 10.7717/peerj.19770 (PMC12338058; doi:10.7717/peerj.19770)
Supplement: Supplemental Information 1 [file peerj-13-19770-s001.xlsx]

## Sheet: Table S1
Sample	Type	ANUCS201		ANUCS202		ANUCS301		ANUCS304		ANUCS305		B01		B02		B05		C11		H09
CG10C1	Marijuana	218	218	155	155	227	227	170	191	156	156	227	227	168	168	215	218	147	156	176	176
CG15C1	Marijuana	218	222	147	157	248	251	170	191	144	156	245	245	168	168	218	218	147	156	166	166
CG19C2	Marijuana	218	218	155	171	248	254	191	191	144	150	254	254	168	168	218	218	154	154	164	164
CG22C1	Marijuana	208	208	155	157	248	248	170	191	156	156	245	245	168	171	209	209	154	156	190	190
CG31C2	Marijuana	208	218	147	147	248	248	191	191	144	156	245	245	168	171	218	218	147	156	-9	-9
CG36c1	Marijuana	218	220	155	157	230	248	191	191	144	156	230	245	168	171	218	218	143	156	190	190
CG38C2	Marijuana	218	218	165	165	227	254	191	191	144	156	227	254	168	171	218	218	154	156	166	166
CG3C1	Marijuana	218	218	155	171	248	251	191	194	144	156	245	245	171	177	218	218	154	154	164	164
CG4C1	Marijuana	208	218	147	157	230	248	170	191	144	156	230	245	171	177	218	218	143	156	-9	-9
H14C2	Marijuana	-9	-9	157	157	227	248	-9	-9	144	150	227	245	168	168	215	215	147	156	184	184
H1C1	Marijuana	218	218	165	171	227	230	191	191	156	156	227	230	168	168	215	218	154	154	182	182
H27 C1	Marijuana	218	218	171	171	230	233	191	191	144	159	230	233	168	177	218	218	147	147	-9	-9
H29 C1	Marijuana	218	218	165	171	230	233	170	191	144	156	230	233	168	168	215	218	154	156	-9	-9
OTc10	Marijuana	218	218	165	171	227	230	191	191	144	159	227	230	168	168	215	218	143	154	206	206
OTc11	Marijuana	218	218	165	171	227	227	179	179	144	156	227	227	168	168	218	218	147	156	190	190
OTc15	Marijuana	218	220	147	165	227	227	-9	-9	144	159	227	227	168	171	218	218	143	156	206	206
OTc16	Marijuana	218	218	165	171	227	230	-9	-9	144	156	227	230	168	168	218	218	147	156	206	206
OTc17	Marijuana	218	218	165	171	227	227	191	191	144	156	227	227	168	168	218	218	143	156	206	206
OTc20	Marijuana	218	218	165	171	227	230	191	191	144	159	227	230	168	168	215	215	143	147	206	206
OTc23	Marijuana	218	218	165	171	227	230	191	191	144	156	227	230	168	168	218	218	147	156	206	206
OTc6	Marijuana	218	220	165	171	227	230	191	191	144	159	227	230	-9	-9	218	218	147	156	206	206
RH10C1	Marijuana	218	218	157	157	227	248	170	170	150	156	227	227	168	168	218	218	147	156	192	192
RH11C2	Marijuana	218	218	157	173	227	248	170	191	150	156	227	245	168	168	218	218	147	156	186	192
RH13C1	Marijuana	218	218	153	173	227	254	170	170	156	156	227	254	168	177	221	221	147	156	182	192
RH20C2	Marijuana	218	218	173	173	227	254	170	170	150	156	227	254	168	168	218	221	147	156	192	192
A.18.1	Hemp	218	218	157	179	248	248	-9	-9	156	159	209	245	168	168	218	218	147	156	206	206
A17.1	Hemp	204	204	157	177	248	251	-9	-9	150	150	245	245	168	168	-9	-9	147	156	186	186
A20.8	Hemp	218	218	157	157	248	248	-9	-9	144	156	245	245	168	168	218	218	147	156	184	184
A29.5	Hemp	204	204	155	177	239	239	170	173	159	159	209	236	168	168	215	215	156	156	186	186
A35.1	Hemp	204	204	157	177	248	248	-9	-9	150	150	245	245	168	168	-9	-9	147	156	186	186
A36.1	Hemp	218	218	157	177	248	248	203	203	150	150	245	254	168	168	-9	-9	147	156	186	186
A7.1	Hemp	218	218	151	151	254	254	170	170	144	150	254	254	168	168	218	218	147	156	186	190
A7.3	Hemp	218	222	155	157	248	248	170	173	150	159	209	245	168	168	218	218	147	156	186	186
A7.6	Hemp	204	204	157	179	248	248	-9	-9	144	150	209	245	168	168	215	215	147	156	186	186
B51	Hemp	218	218	151	151	251	254	179	191	150	150	254	254	168	168	218	218	147	156	186	190
B53	Hemp	218	218	151	151	254	254	170	170	144	150	254	254	168	168	218	218	147	156	186	190
B53.N2.16(1)	Hemp	218	218	151	151	251	254	209	209	144	144	251	254	168	168	218	218	143	156	190	190
B53.N2.16(2)	Hemp	218	218	151	151	251	254	-9	-9	144	144	251	254	168	171	218	218	143	156	190	190
B53.N2.16(3)	Hemp	218	218	151	151	251	254	191	191	144	144	251	254	171	171	218	218	143	156	206	206
B53.N2.22(1)	Hemp	218	218	151	151	239	254	-9	-9	144	144	239	254	171	171	218	218	143	156	186	192
B53.N2.22(2)	Hemp	218	218	151	151	251	254	209	209	144	150	251	254	171	171	218	218	143	156	190	190
B53.N2.22(3)	Hemp	218	218	151	151	239	251	209	209	144	150	239	251	168	171	218	218	143	156	186	186
B53xB53N28(1)	Hemp	218	218	151	151	251	254	170	170	150	162	251	254	168	171	218	218	147	156	192	196
B53xB53N28(2)	Hemp	218	218	151	151	251	254	170	170	144	150	254	254	168	171	218	218	147	156	186	190
B53xB53N28(3)	Hemp	-9	-9	151	151	251	254	170	170	144	150	-9	-9	168	168	218	218	147	156	-9	-9
BIAWBRE25HIE	Hemp	220	220	155	183	236	251	173	173	144	144	236	251	171	171	215	215	143	156	190	190
C5	Hemp	-9	-9	145	155	254	254	173	173	150	162	257	257	168	168	215	215	147	156	206	206
CARMAGNOLA	Hemp	214	214	155	159	248	248	173	173	144	150	245	251	171	171	215	215	147	156	170	206
CB611	Hemp	204	204	157	157	236	248	173	173	144	144	236	245	168	168	215	215	143	156	-9	-9
D1.2	Hemp	218	218	157	157	233	233	191	191	144	156	233	233	171	171	218	218	147	156	-9	-9
D7.1	Hemp	218	218	155	159	248	248	170	170	150	159	245	245	168	168	218	218	147	156	186	186
D7.1.29(1)	Hemp	204	204	177	177	248	248	170	173	144	144	245	245	168	168	-9	-9	147	156	186	186
D7.1.29(2)	Hemp	218	222	155	155	248	248	173	179	144	159	245	245	168	168	218	218	147	156	-9	-9
D7.1.29(3)	Hemp	218	218	151	161	248	248	170	170	144	144	245	245	168	168	218	218	147	156	186	186
D7.7	Hemp	218	222	179	179	239	248	203	203	150	159	239	245	168	168	218	218	147	156	182	186
D7.7.36.1	Hemp	218	222	175	175	248	248	-9	-9	144	150	245	245	168	168	218	218	143	147	186	186
D7.7.36.2	Hemp	218	218	151	177	239	248	191	191	150	150	239	245	168	168	218	218	154	156	186	186
D7.7.36.3	Hemp	218	222	151	151	248	254	-9	-9	150	150	239	251	168	168	218	218	147	156	186	186
D7.7.49(1)	Hemp	218	218	151	177	239	248	173	173	144	150	239	245	168	168	218	218	154	156	186	186
D7.7.49(2)	Hemp	218	218	151	177	239	248	173	173	150	150	239	245	168	168	218	218	154	156	186	186
D7.7.49(3)	Hemp	218	218	151	177	239	248	203	203	150	159	239	245	168	168	218	218	147	156	198	198
FEDORA 17	Hemp	220	220	149	155	236	236	173	173	144	159	236	236	168	171	215	215	143	147	178	204
FELINA32	Hemp	204	204	155	155	251	251	173	173	144	159	245	254	171	171	215	218	143	147	184	192
FERIMON	Hemp	-9	-9	145	155	230	230	173	173	144	144	230	230	168	168	215	215	143	147	192	192
FINOLA	Hemp	204	204	151	157	218	218	173	173	147	162	218	227	168	168	215	215	143	147	176	176
FMC01	Hemp	218	218	157	157	251	254	-9	-9	144	150	254	254	168	177	218	218	147	156	186	186
FMc02	Hemp	218	218	155	155	254	254	170	170	150	156	254	254	168	168	218	218	143	147	182	192
FUTURA75	Hemp	-9	-9	147	147	230	251	203	203	138	144	230	251	168	171	215	215	143	156	208	208
G0c04	Hemp	218	218	151	151	254	254	170	170	156	156	254	257	168	168	218	218	143	156	182	186
GOC03	Hemp	218	218	157	157	248	248	170	170	156	156	245	245	168	177	218	218	143	156	186	186
I7.1	Hemp	218	218	151	151	248	254	-9	-9	156	159	245	245	168	171	218	218	147	156	186	198
K1.2	Hemp	218	218	151	161	227	251	209	209	144	150	227	251	168	168	218	218	147	154	184	192
KACO1	Hemp	218	220	157	157	251	254	203	203	150	156	254	254	168	168	218	218	143	147	186	186
KC DORA	Hemp	222	222	157	157	224	236	173	173	144	144	224	236	168	168	215	215	143	156	202	202
KOMPOL11	Hemp	222	222	157	157	254	254	173	173	138	138	245	251	171	171	-9	-9	147	147	206	206
NWo1	Hemp	218	218	157	157	251	254	170	170	150	150	254	254	168	168	218	218	147	156	186	186
SANTHICA 27	Hemp	-9	-9	-9	-9	230	236	-9	-9	144	144	230	236	-9	-9	-9	-9	143	156	190	190
SANTHICA70	Hemp	-9	-9	155	155	-9	-9	173	173	144	144	245	245	168	171	215	215	143	156	170	192
STc04	Hemp	218	218	151	151	254	254	170	170	150	156	254	254	168	168	218	218	154	156	182	182
STc05	Hemp	218	218	151	151	251	254	170	170	156	156	254	254	168	168	218	218	143	156	182	186
TIBORSZALLASI	Hemp	222	222	155	161	248	251	182	182	138	138	251	251	168	171	215	215	143	147	210	210
TYGRA	Hemp	216	218	151	153	236	236	173	173	138	159	236	236	171	171	215	218	143	147	210	210
USO 31	Hemp	208	208	161	161	251	251	173	173	144	144	251	251	168	171	218	218	143	143	-9	-9
